# Supplementary material for: The Association of Ovarian Teratoma and Anti-N-Methyl-D-Aspartate Receptor Encephalitis: An Updated Integrative Review
Source: MDPI journal article supplement (doi:10.3390/ijms222010911), 2021-10-09
Supplement: s1 [file s1]

**Table S2. Comparison of Neuroglial and Immune Cell Populations in ovarian teratomas with or without anti-NMDAR encephalitis [56]**

| Characteristics                                                                    | Teratomas with encephalitis (n=12) | Teratomas without encephalitis (n=61) | P value  |
|------------------------------------------------------------------------------------|------------------------------------|---------------------------------------|----------|
| Immune cell population involving neuroglial tissue                                 |                                    |                                       |          |
| ➤ Diffuse lymphoplasmacytic infiltrate in neuropil                                 | 30 (cells/hpf)                     | 14 (cells/hpf)                        | < 0.05   |
| ➤ Presence of lymphoid aggregates without germinal centers around neuropil         | 100%                               | 70%                                   | < 0.05   |
| ➤ Presence of lymphoid aggregates without germinal centers around ganglia clusters | 80%                                | 11%                                   | < 0.05   |
| ➤ Presence of lymphoid aggregates with germinal centers around neuropil            | 92%                                | 7%                                    | <0.0001  |
| ➤ Lymphoid aggregates with germinal centers around neuropil (number per tumor)     | 3                                  | 0                                     | <0.0001  |
| Immune cell population involving non-neuroglial tissue                             |                                    |                                       |          |
| ➤ Lymphoid aggregates without germinal centers (number per tumor)                  | 3                                  | 10                                    | < 0.01   |
| Neuroglial population                                                              |                                    |                                       |          |
| ➤ Percent of teratoma composed of neuroglial tissues                               | 5.2%                               | 1.3%                                  | < 0.01   |
| ➤ Astrocytes per hpf of neuropil                                                   | 200                                | 97                                    | < 0.0001 |
| ➤ Mature neurons per hpf of neuropil                                               | 1                                  | 7                                     | < 0.001  |
| ➤ NeuN positive cells per hpf of neuropil                                          | 0                                  | 18                                    | < 0.01   |
| ➤ Total surface area of neuroglial tissues                                         | 0.1 cm <sup>2</sup>                | 0.5 cm <sup>2</sup>                   | < 0.001  |
| Overall tumor size                                                                 | 1.9 cm                             | 7.5 cm                                | < 0.0001 |
| Hpf: high power field.                                                             |                                    |                                       |          |
