# Supplementary material for: The Association of Ovarian Teratoma and Anti-N-Methyl-D-Aspartate Receptor Encephalitis: An Updated Integrative Review
Source: MDPI journal article supplement (doi:10.3390/ijms222010911), 2021-10-09
Supplement: s1 [file s1]

| Table S1. The Modified Rankin Scale (mRS)                                       |                                                                                                                       |
|---------------------------------------------------------------------------------|-----------------------------------------------------------------------------------------------------------------------|
| The scale runs from 0–6, running from perfect health without symptoms to death. |                                                                                                                       |
| 0                                                                               | No symptoms                                                                                                           |
| 1                                                                               | No significant disability. Able to carry out all usual activities, despite some symptoms                              |
| 2                                                                               | Slight disability. Able to look after own affairs without assistance, but unable to carry out all previous activities |
| 3                                                                               | Moderate disability. Requires some help, but able to walk unassisted                                                  |
| 4                                                                               | Moderately severe disability. Unable to attend to own bodily needs without assistance, and unable to walk unassisted  |
| 5                                                                               | Severe disability. Requires constant nursing care and attention, bedridden, incontinent                               |
| 6                                                                               | Dead                                                                                                                  |
